# Supplementary figures and images for: Effect of Different Catalyst Deposition Technique on Aligned Multiwalled Carbon Nanotubes Grown by Thermal Chemical Vapor Deposition
Source: Hindawi journal article supplement (doi:10.1155/2014/707301), 2014-01-01

# APPENDIX 1

Table 1

| Sample | Iron deposition time (s) |
|--------|--------------------------|
| (a)    | 30                       |
| (b)    | 60                       |
| (c)    | 90                       |
| (d)    | 120                      |

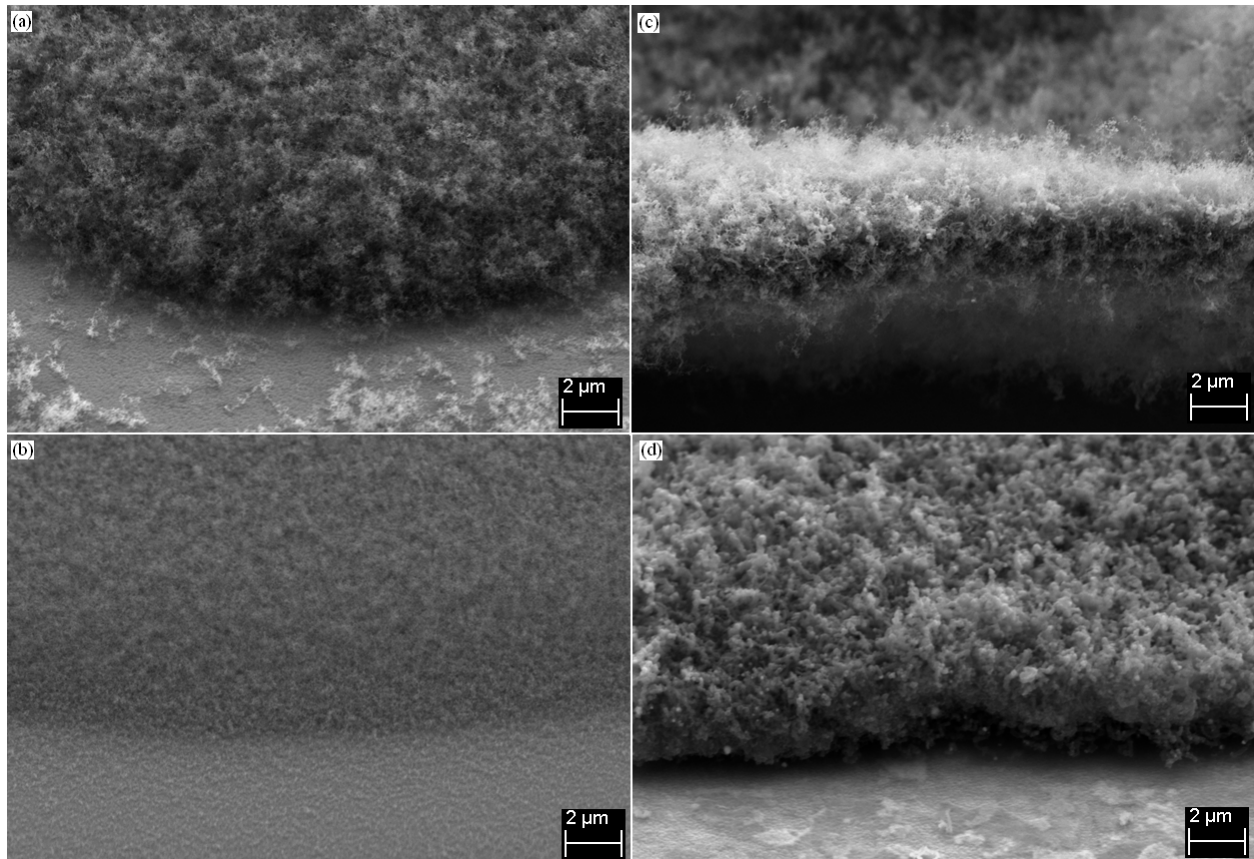

Figure 1

Supplement: f1 [file 707301.f1.pdf]
